# Supplementary material for: Sulfur poisoning of emergent and current electrocatalysts: vulnerability of MoS2, and direct correlation to Pt hydrogen evolution reaction kinetics
Source: Royal Society of Chemistry journal article supplement (doi:10.1039/c5nr01378j), 2015-01-01
Supplement: c5nr01378j1.pdf [file c5nr01378j1.pdf]

**Sulfur poisoning of emergent and current electrocatalysts:  
vulnerability of MoS<sub>2</sub>, and direct correlation to Pt hydrogen  
evolution reaction kinetics**

Shu Min Tan<sup>a</sup>, Zdenek Sofer<sup>b</sup>, and Martin Pumera<sup>a,\*</sup>

<sup>a</sup> School of Physical and Mathematical Science, Division of Chemistry and Biological Chemistry,  
Nanyang Technological University, 21 Nanyang Link, Singapore 637371.

pumera.research@gmail.com

<sup>b</sup> Department of Inorganic Chemistry, University of Chemistry and Technology Prague,  
Technická 5, 166 28 Prague 6, Czech Republic.

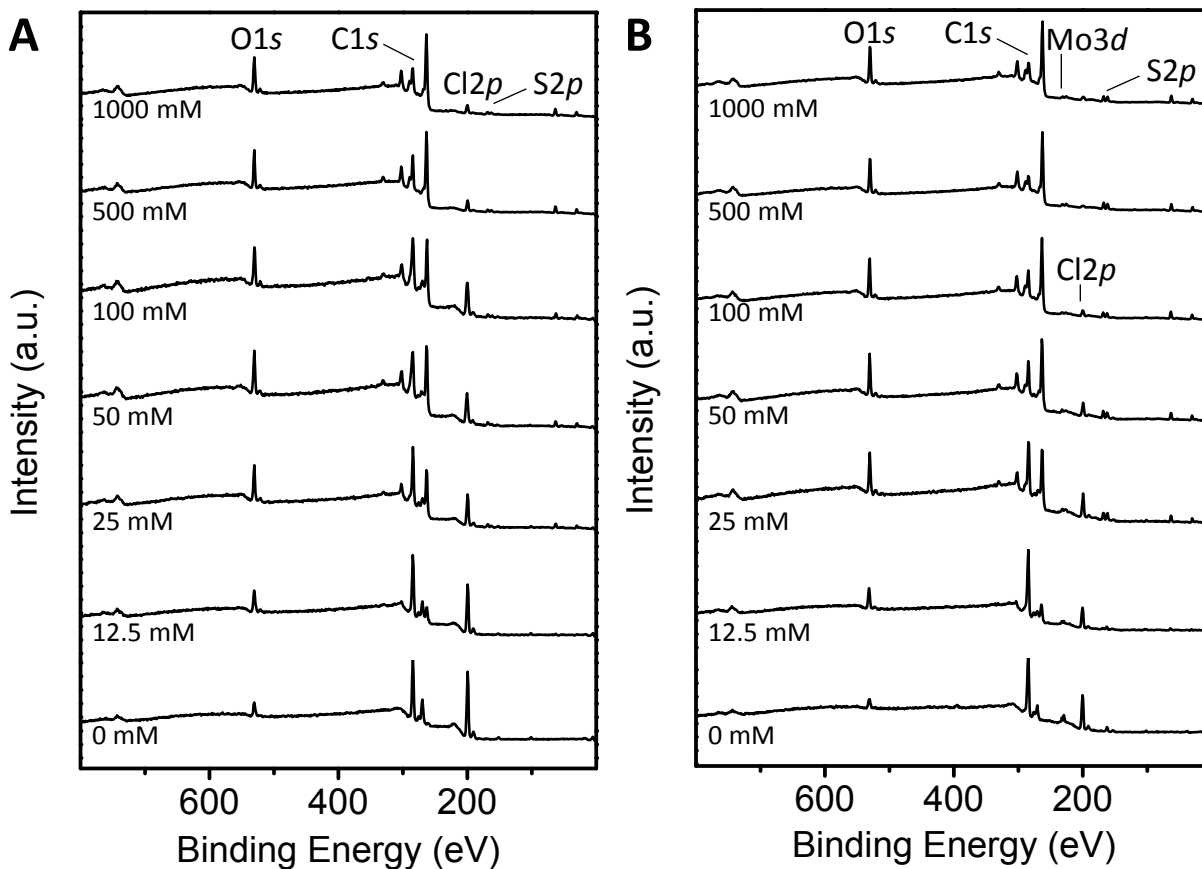

**Figure S1.** Survey scan XPS spectra of Pt/C (A) and MoS<sub>2</sub> (B) poisoned with increasing concentrations of NaHS, in which several prominent peaks were labelled. The concentrations of NaHS used are 0, 12.5, 25, 50, 100, 500 and 1000 mM, as indicated in the individual spectra.

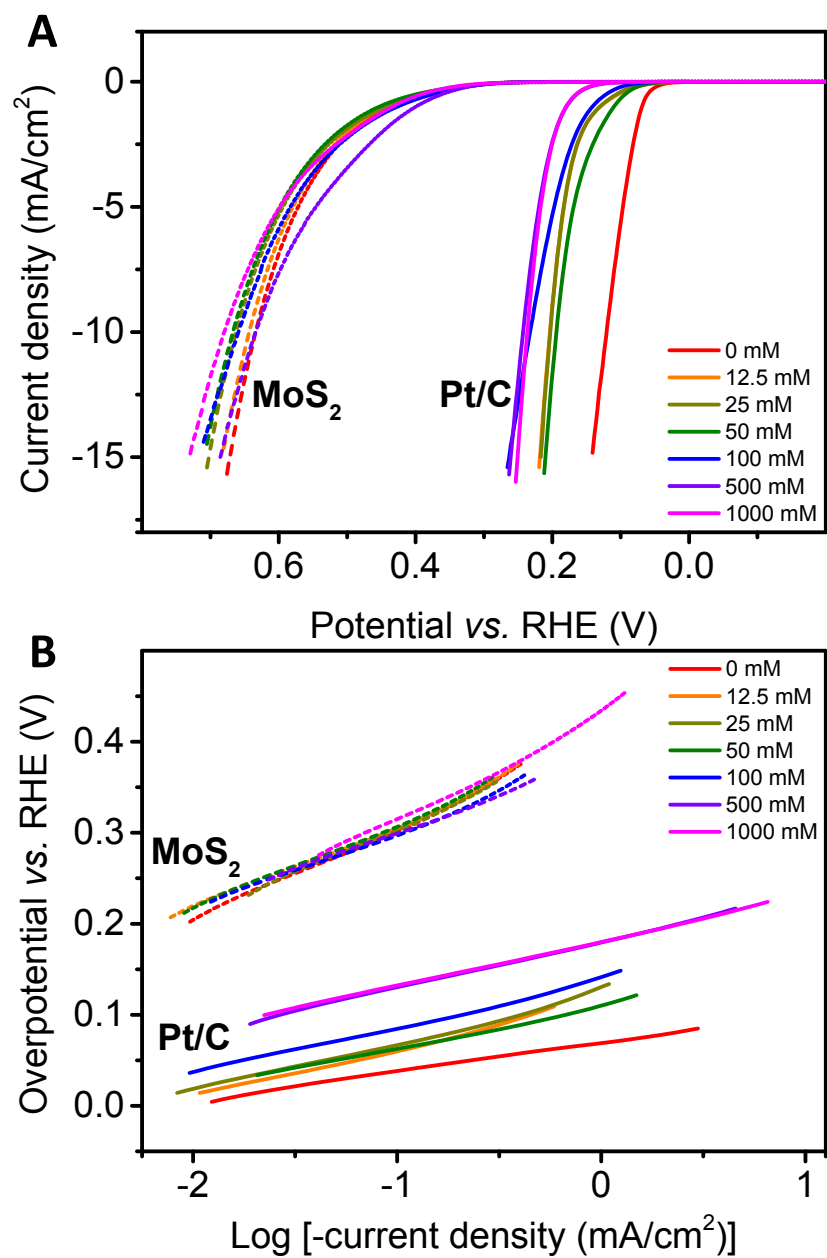

**Figure S2.** (A) HER LSV curves of Pt/C and MoS<sub>2</sub> poisoned with increasing concentrations of NaHS. (B) Corresponding Tafel plots of curves in (A).

**Table S1.** Surface atomic compositions of Pt/C and MoS<sub>2</sub> quantified from wide scan XPS spectra.

| [NaHS]/mM | atomic percentage (at.%) |             |             |                  |              |             |             |
|-----------|--------------------------|-------------|-------------|------------------|--------------|-------------|-------------|
|           | Pt/C                     |             |             | MoS <sub>2</sub> |              |             |             |
|           | S2 <i>p</i>              | C1 <i>s</i> | O1 <i>s</i> | S2 <i>p</i>      | Mo3 <i>d</i> | C1 <i>s</i> | O1 <i>s</i> |
| 0         | 1.41                     | 63.27       | 6.60        | 2.78             | 0.86         | 73.34       | 4.92        |
| 12.5      | 1.73                     | 65.67       | 10.10       | 2.77             | 0.37         | 77.28       | 8.40        |
| 25        | 2.98                     | 67.07       | 14.12       | 7.78             | 0.80         | 65.00       | 15.17       |
| 50        | 3.17                     | 65.39       | 15.53       | 10.07            | 0.85         | 60.66       | 18.48       |
| 100       | 3.24                     | 65.98       | 13.82       | 8.07             | 0.46         | 63.81       | 21.33       |
| 500       | 3.45                     | 69.51       | 18.29       | 12.88            | 0.99         | 56.76       | 24.59       |
| 1000      | 4.01                     | 66.31       | 21.51       | 9.51             | 0.72         | 61.59       | 22.65       |
